# Supplementary material
Source: PubMed Central journal article supplement (PMC9290189)

# Kugeratski et al. Supplementary Figure 1

Serum-free medium cells for exosomes production:

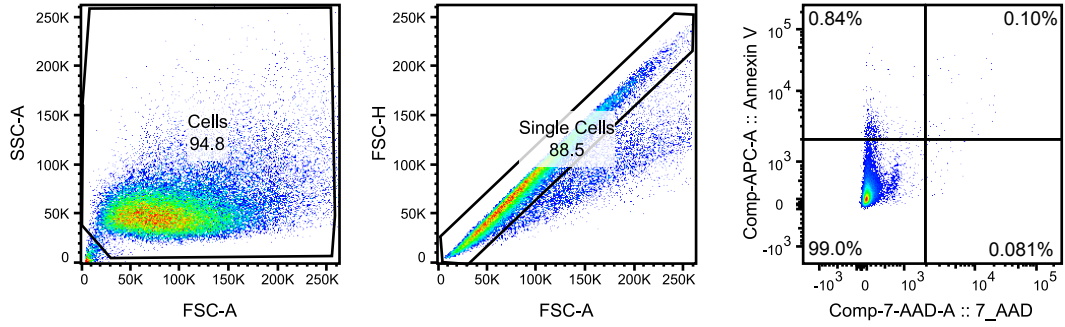

Negative control (unstained cells):

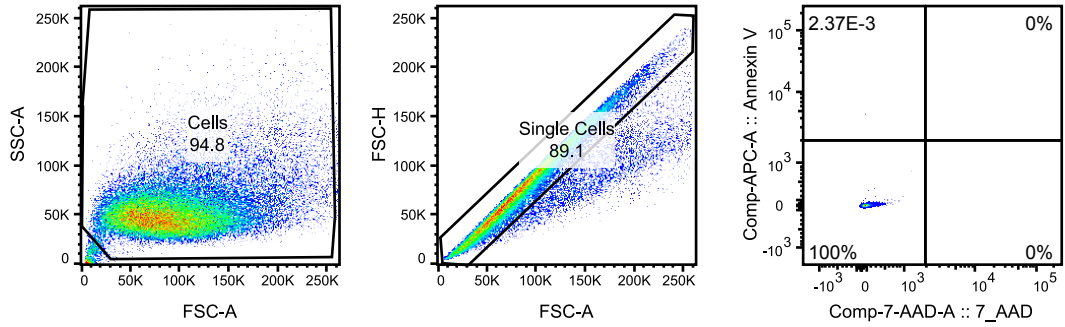

Positive control (apoptotic cells spiked-in):

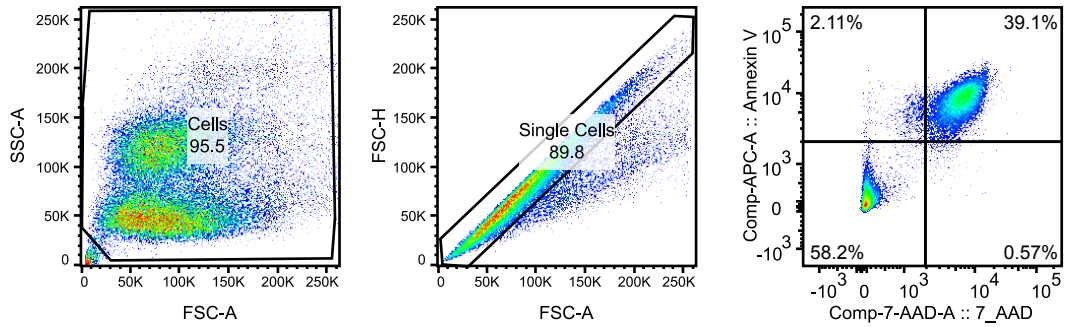

Gating strategy: Cells > Single cells > Apoptotic cells (Annexin V+ and 7-AAD+)

Kugeratski et al. Supplementary Figure 2

a

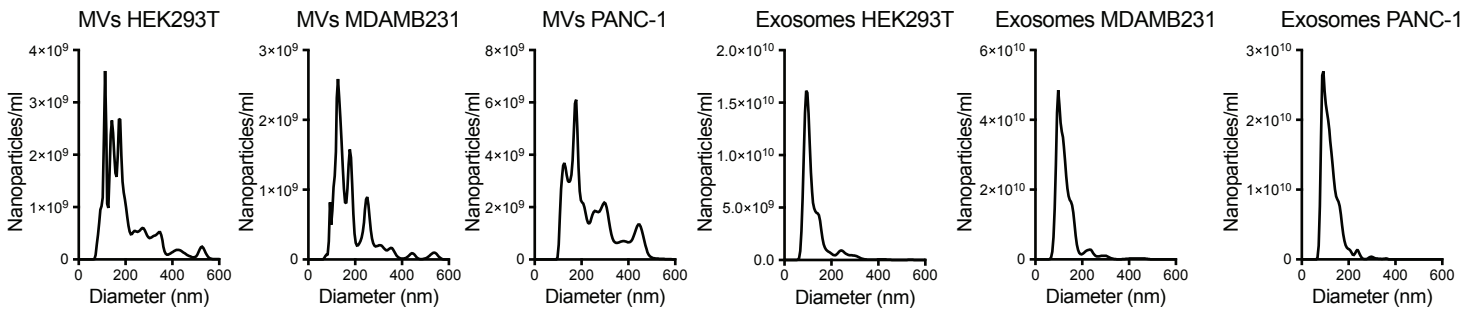

b

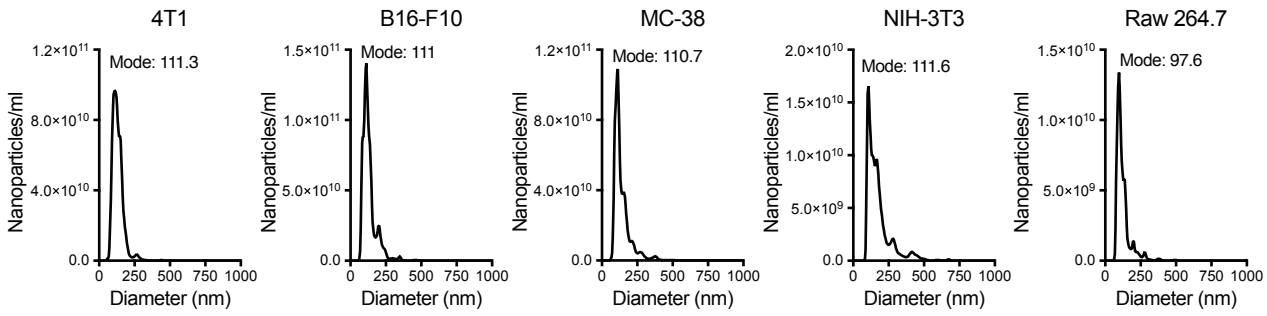

c

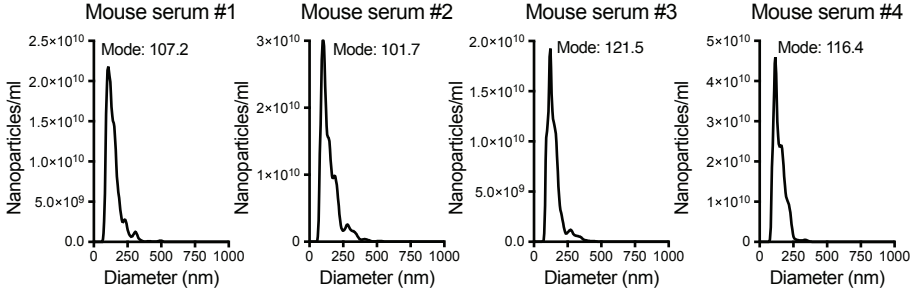

d

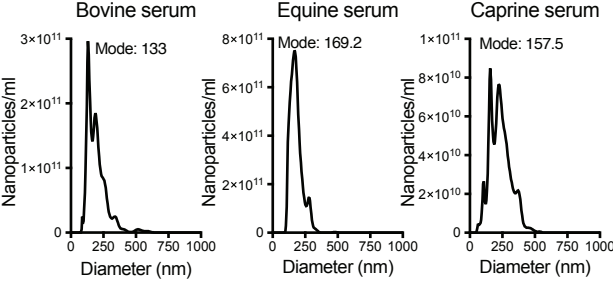

e

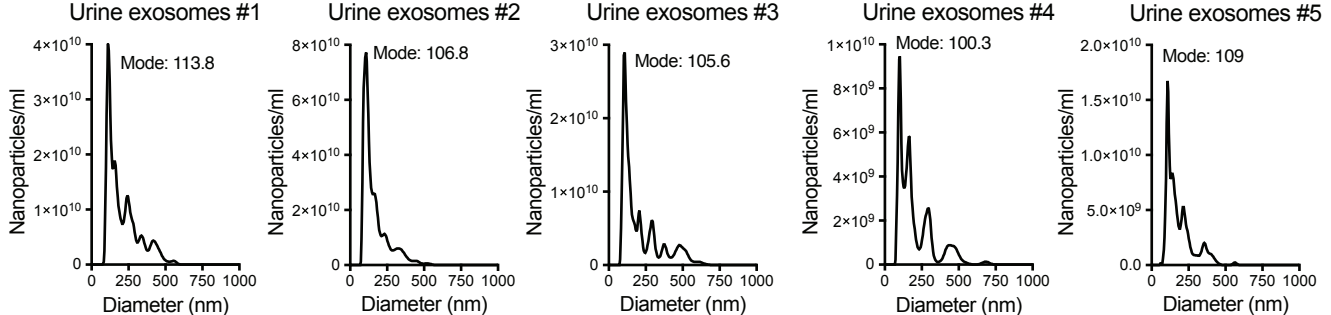

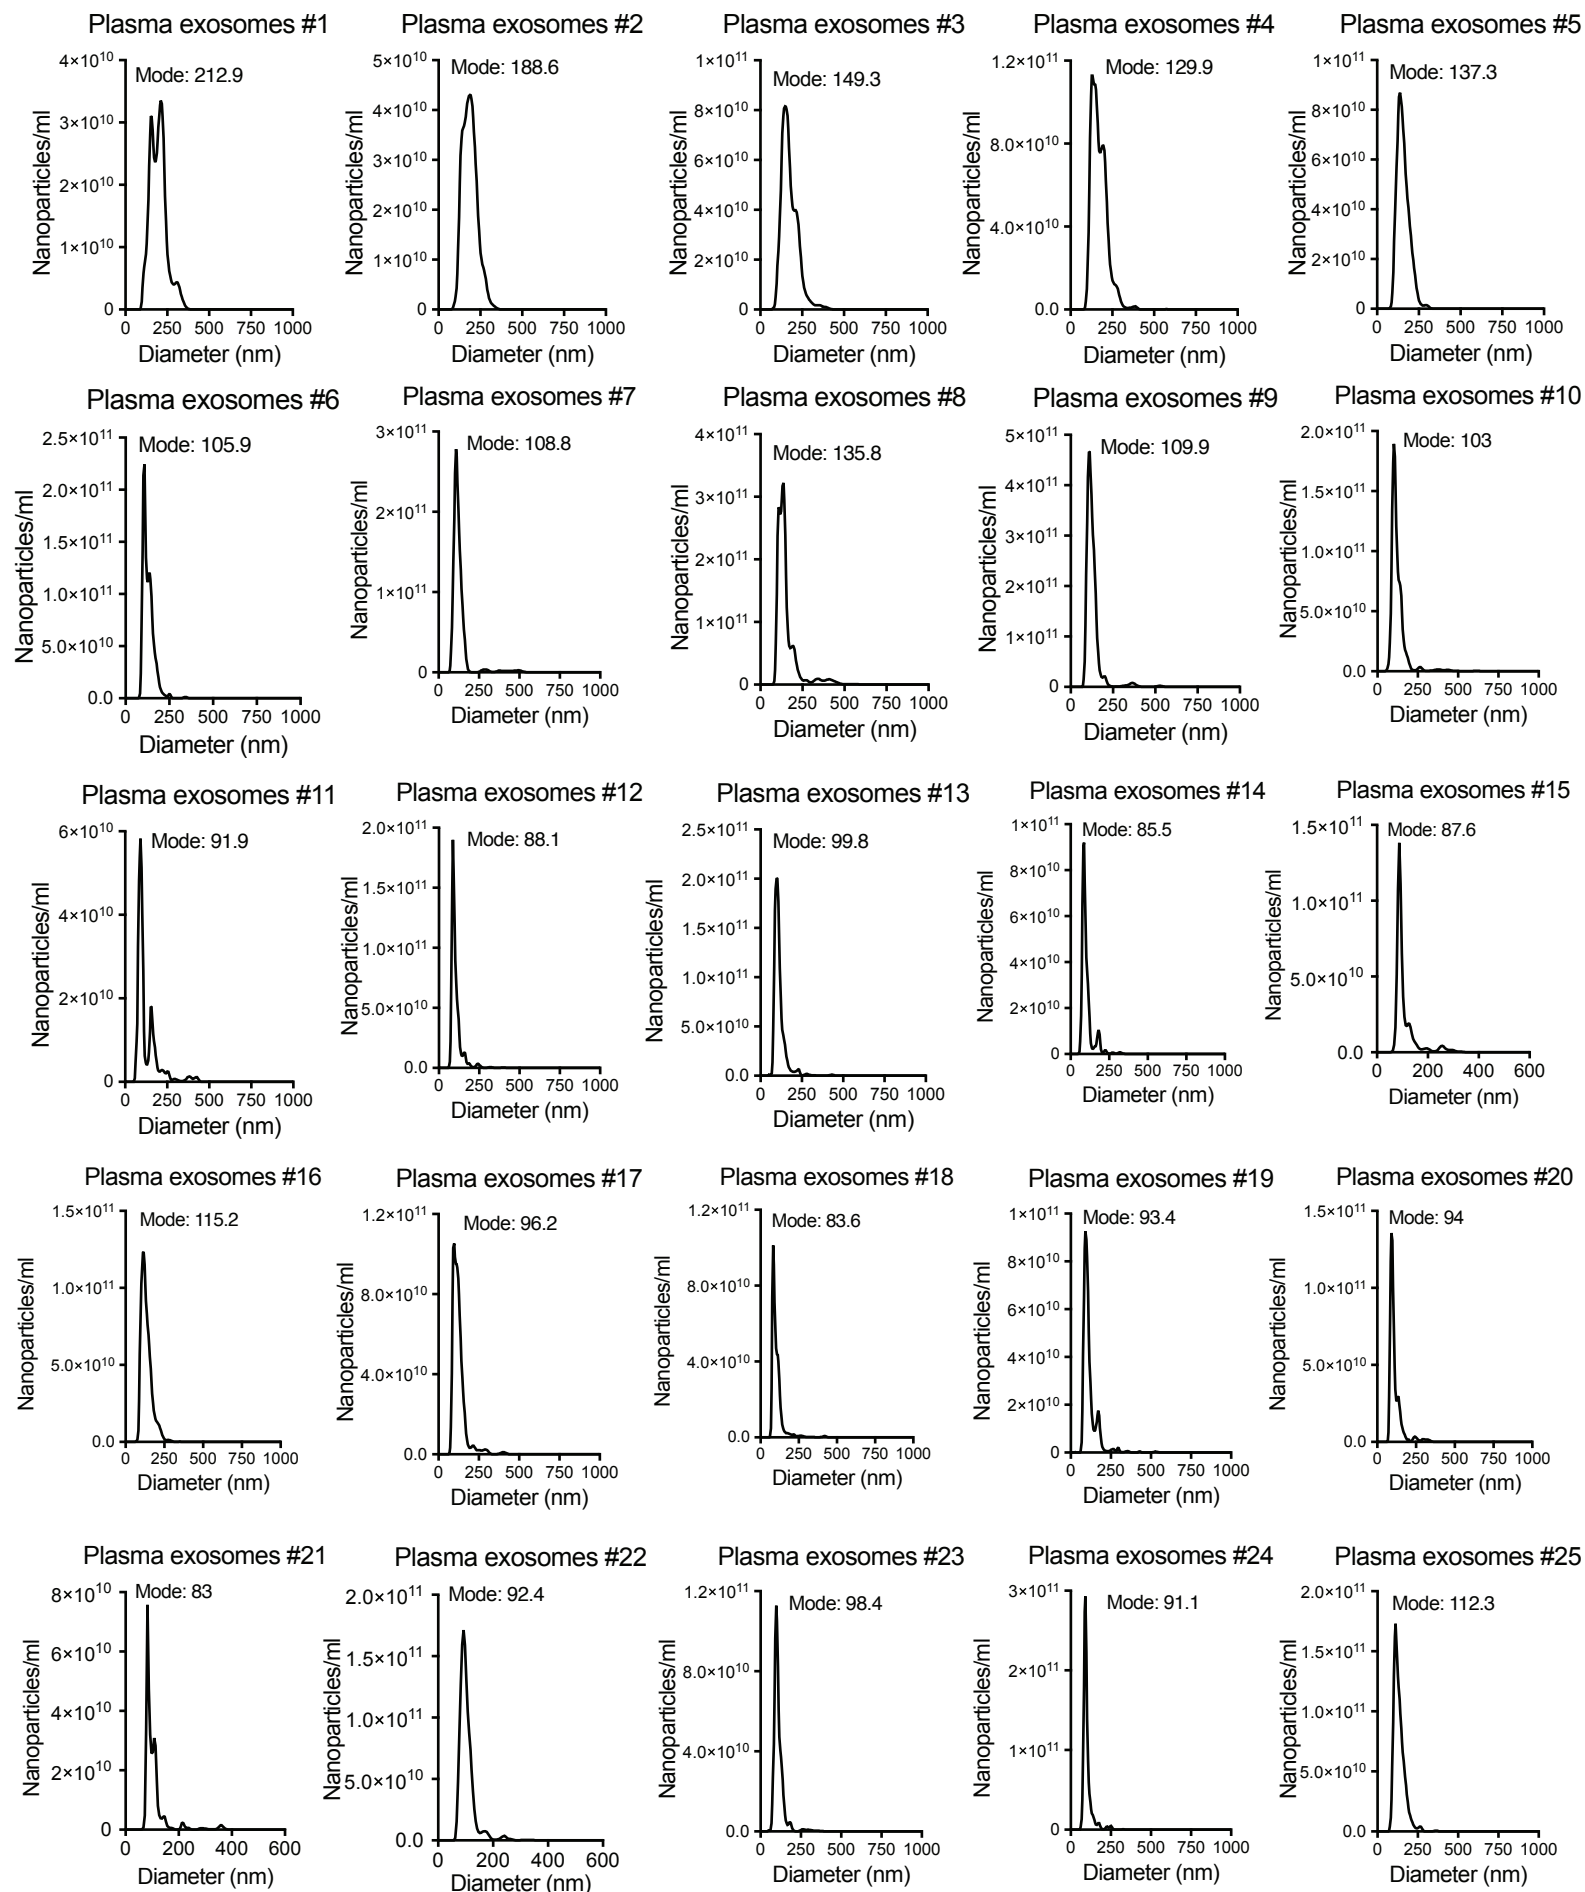

Kugeratski et al. Supplementary Figure 4

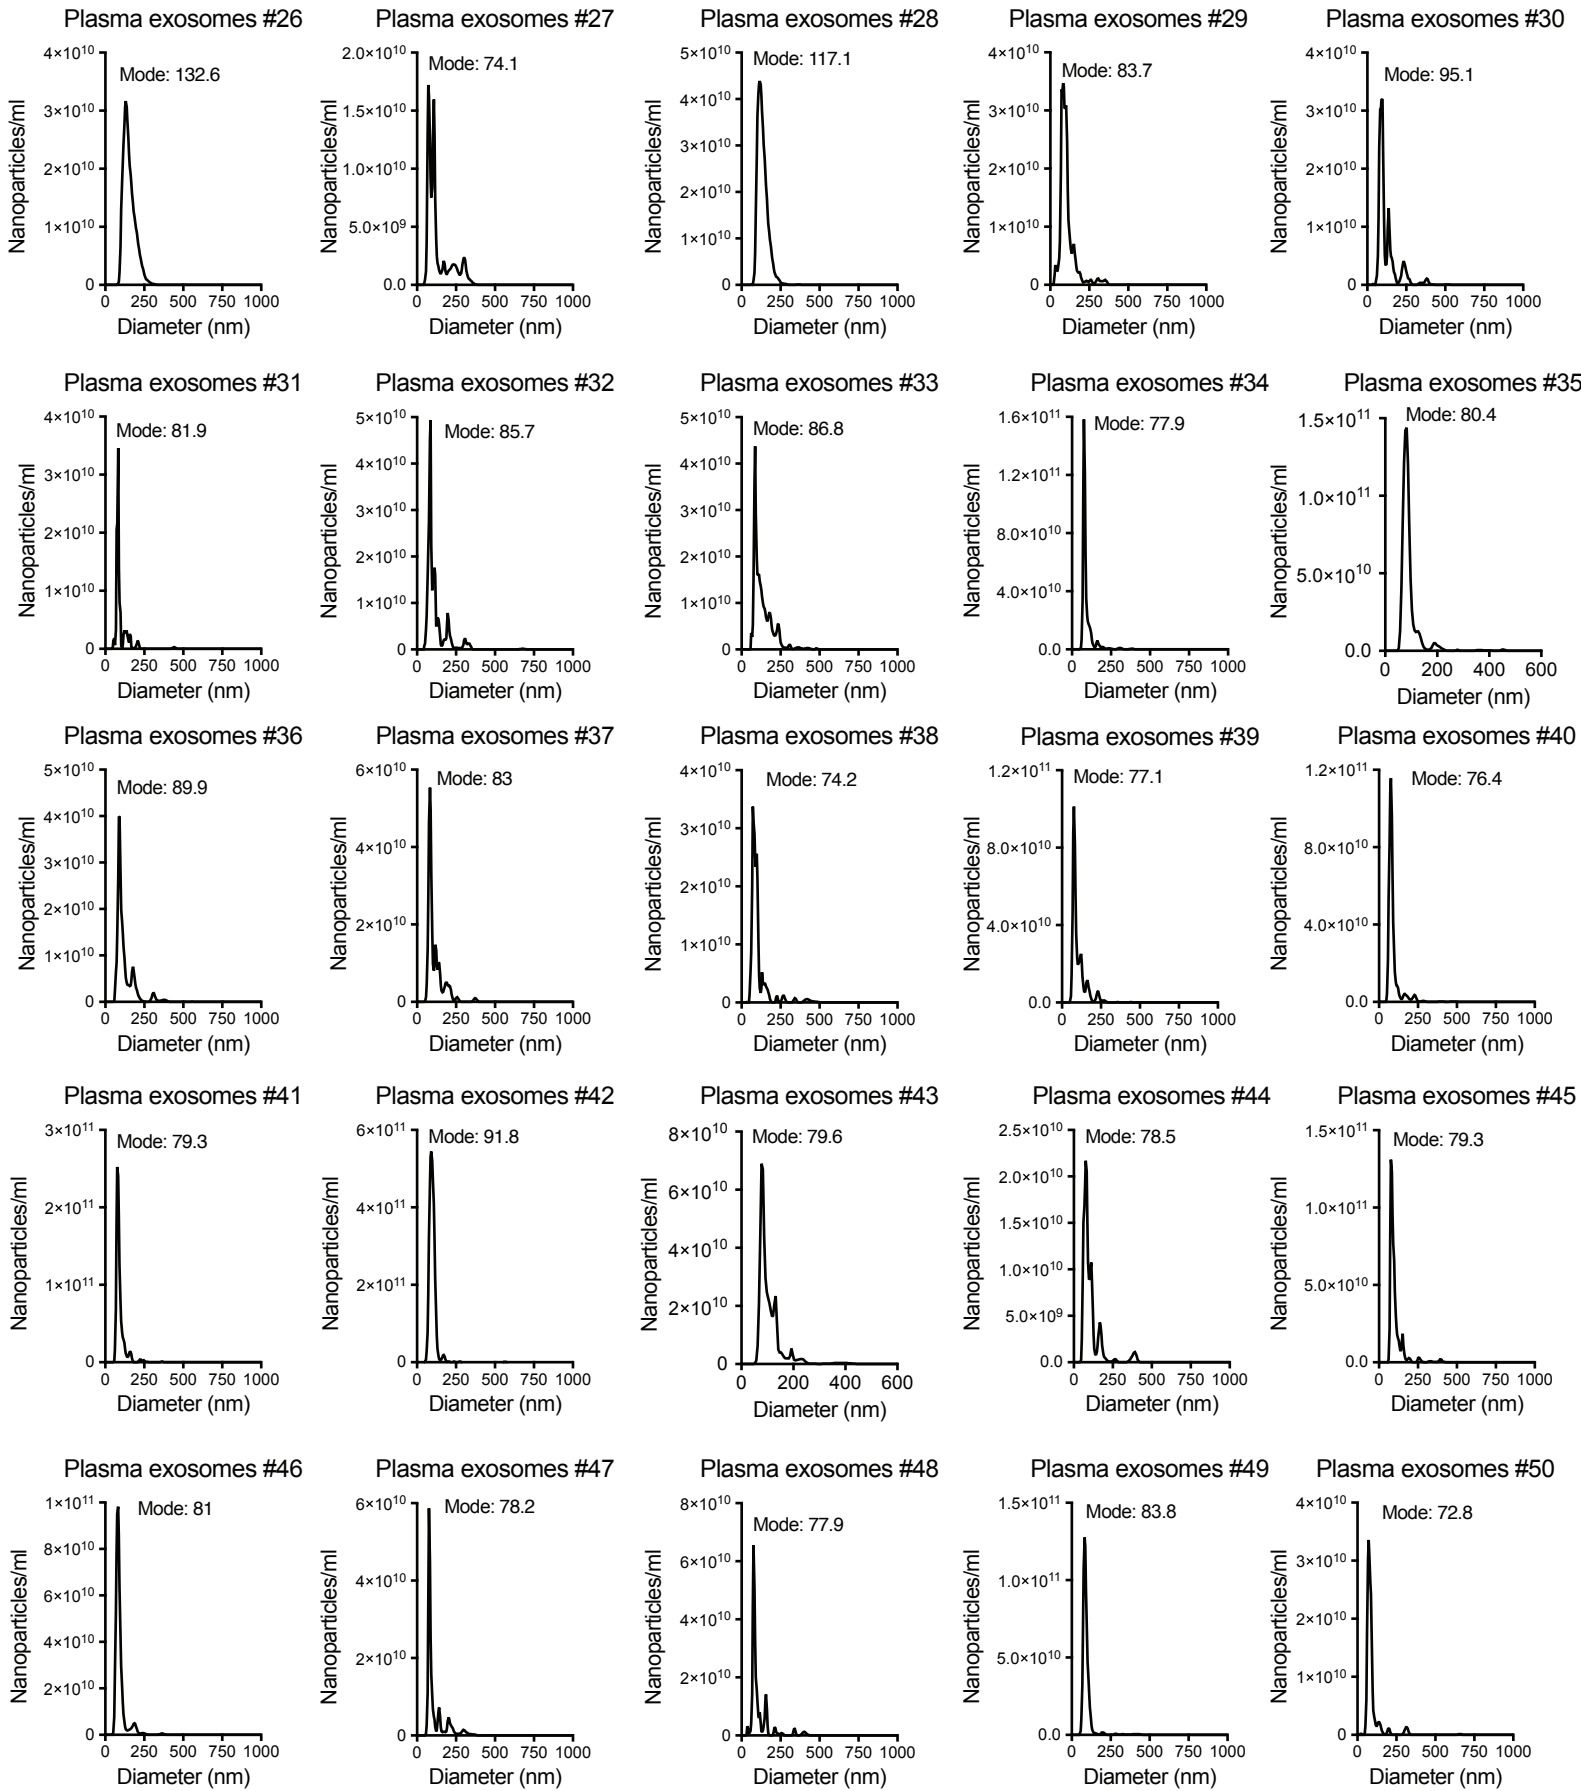

**Kugeratski et al. Supplementary Figure 5**

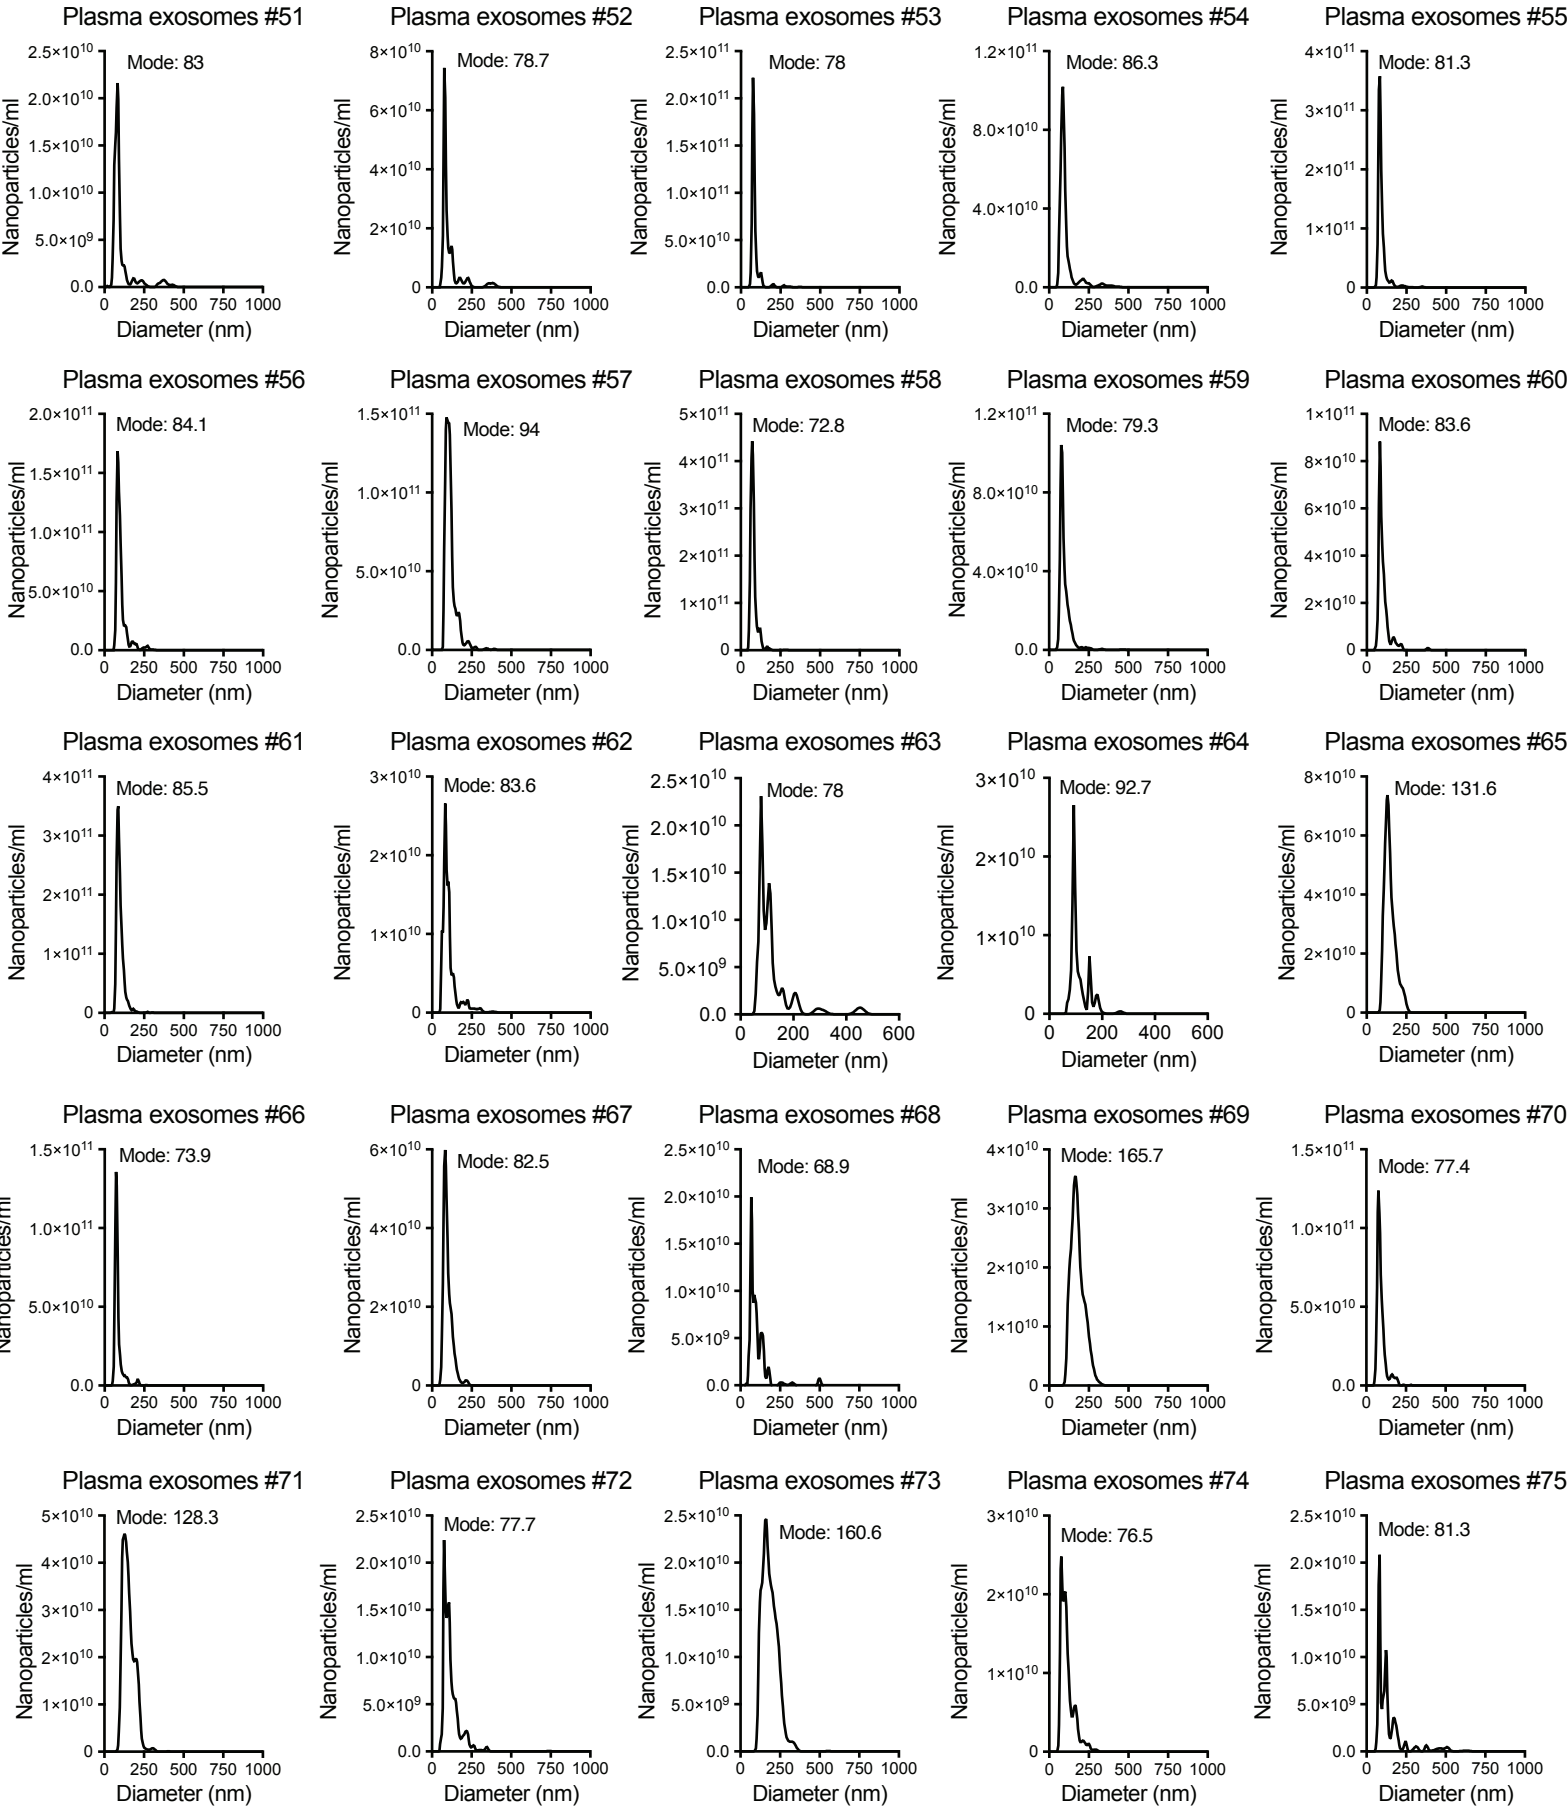

**Kugeratski et al. Supplementary Figure 6**

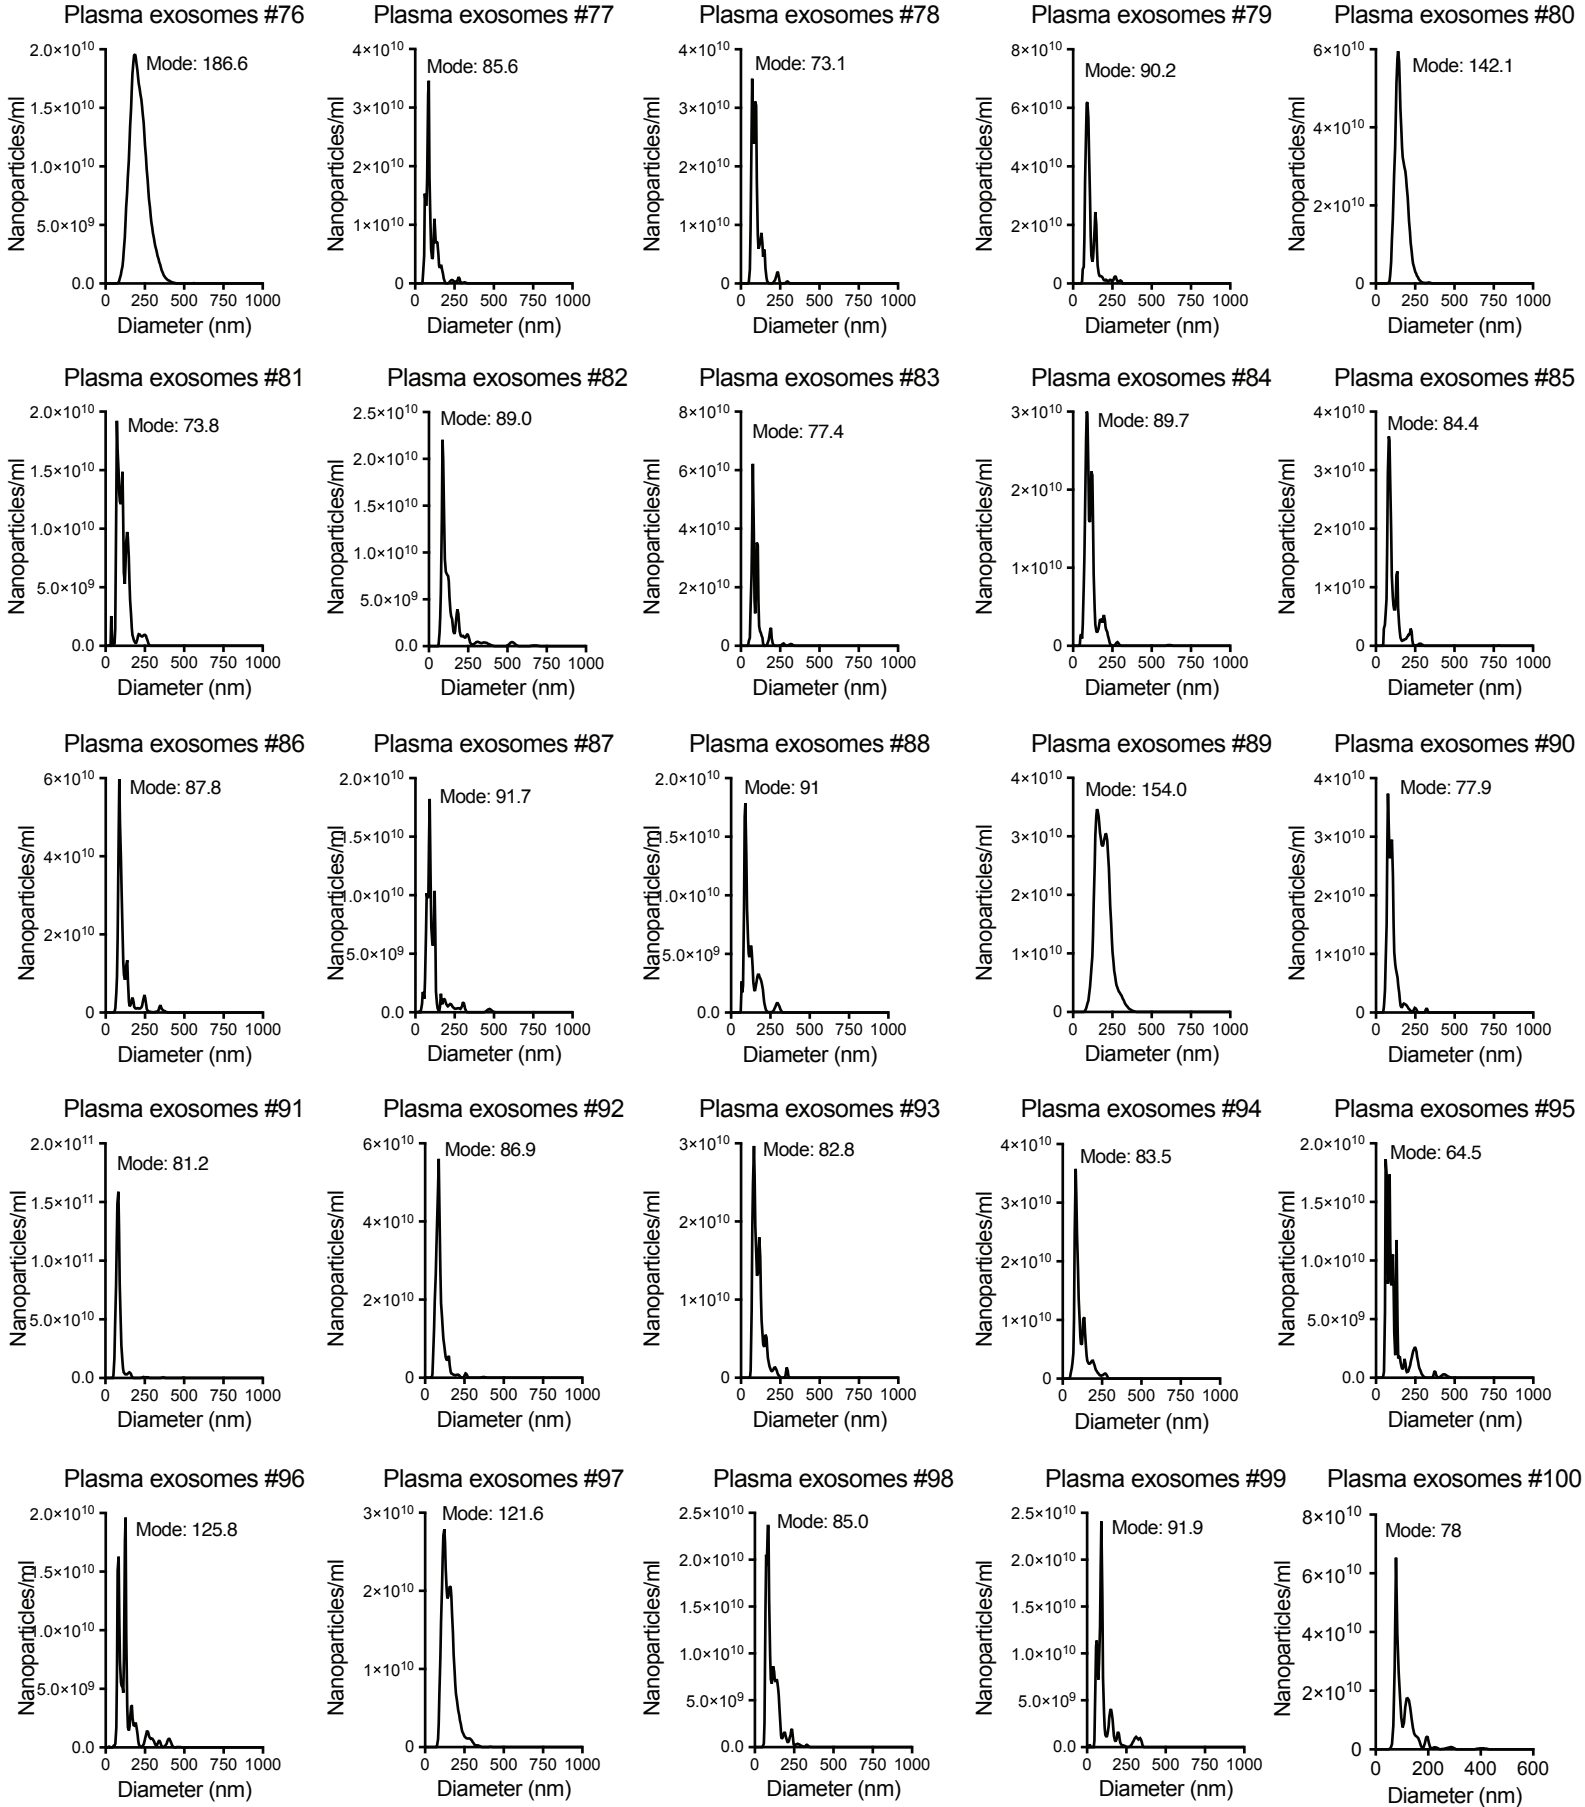

Supplement: NIHMS1808465-supplement-Supplementary_figures_merged.pdf [file NIHMS1808465-supplement-Supplementary_figures_merged.pdf]
